# Supplementary material
Source: PubMed Central journal article supplement (PMC7737843)
Supplement: NIHMS1503990-supplement-Sup_1.pdf [file NIHMS1503990-supplement-Sup_1.pdf]

**Table S1.** Entire Dataset Used to Compare Zebrafish Embryo and Juvenile Fish Toxicity Test Endpoints.

| Chemical                        | Juvenile Trout LC50 | Juvenile Bluegill LC50 | Juvenile Sheepshead LC50 | All Juvenile Fish LC50 | Zebrafish Embryo AC50 | Zebrafish Embryo LC50 | Molecular Weight | Log P | General Mode of Action | Target Group |
|---------------------------------|---------------------|------------------------|--------------------------|------------------------|-----------------------|-----------------------|------------------|-------|------------------------|--------------|
| ZE-Fenpyroximate                | 0.0011              | 0.0020                 | NA                       | 0.0015                 | 0.0582                | 0.0789                | 421.49           | 5.01  | NA                     | Insect       |
| 24-DB                           | 5.3479              | 11.2250                | NA                       | 7.7479                 | 4.7907                | 6.4313                | 249.09           | 3.53  | Narcosis               | Plant        |
| 3-Iodo-2-propynylbutylcarbamate | 0.0695              | 0.2260                 | 0.4180                   | 0.1872                 | 0.3015                | 0.7168                | 281.09           | 2.45  | Narcosis               | Fungi        |
| Abamectin                       | 0.0036              | 0.0096                 | 0.0150                   | 0.0080                 | 0.0151                | 0.0317                | 873.08           | 4.39  | Non-AChE neurotoxicity | Insect       |
| Acetochlor                      | 0.7099              | 1.3000                 | 2.1000                   | 1.2468                 | 6.3890                | 7.1866                | 269.77           | 3.03  | Narcosis               | Plant        |
| Acibenzolar-S-Methyl            | 0.8800              | 1.6000                 | 1.7000                   | 1.3377                 | 2.2790                | 3.2342                | 210.28           | 3.1   | NA                     | Fungi        |
| Alachlor                        | 2.0785              | 3.4699                 | 3.9000                   | 3.0412                 | 6.9940                | 7.1866                | 269.77           | 3.52  | Narcosis               | Plant        |
| Aldicarb                        | 0.5600              | 0.0852                 | 0.0835                   | 0.1585                 | 10.3634               | NA                    | 190.26           | 1.13  | AChE neurotoxicity     | Insect       |
| Amitraz                         | 0.7400              | 0.6750                 | NA                       | 0.7067                 | 4.2537                | 7.8163                | 293.41           | 5.5   | NA                     | Insect       |
| Anilazine                       | 0.1400              | 0.3200                 | NA                       | 0.2117                 | 7.2687                | 7.3399                | 275.52           | 3.88  | Narcosis               | Fungi        |
| Azinphos-methyl                 | NA                  | 0.0095                 | 0.0027                   | 0.0051                 | 2.9469                | 8.7232                | 317.32           | 2.75  | AChE neurotoxicity     | Insect       |
| Azoxystrobin                    | 0.4700              | 1.1000                 | 0.6710                   | 0.7026                 | 1.4527                | 2.0681                | 403.39           | 2.5   | Narcosis               | Fungi        |
| Bendiocarb                      | 1.3638              | 0.9579                 | 0.8600                   | 1.0396                 | 7.6020                | 10.3052               | 223.23           | 1.7   | AChE neurotoxicity     | Insect       |
| Benfluralin                     | 0.8100              | 0.1975                 | NA                       | 0.4000                 | 1.5680                | NA                    | 335.28           | 5.29  | Reactivity             | Plant        |
| Benomyl                         | 0.1700              | 0.7570                 | 3.7920                   | 0.7873                 | 0.3136                | 0.4995                | 290.32           | 2.12  | NA                     | Fungi        |
| Bensulfuron-methyl              | NA                  | NA                     | NA                       | NA                     | 29.3550               | NA                    | 410.40           | 2.45  | NA                     | Plant        |
| Bensulide                       | 0.8899              | 0.8100                 | 0.5600                   | 0.7391                 | 4.0698                | 6.1140                | 397.51           | 4.2   | Narcosis               | Plant        |
| Bifenazate                      | 0.7600              | 0.5800                 | 0.4160                   | 0.5681                 | 3.0452                | 2.7512                | 300.35           | 4.14  | Reactivity             | Insect       |
| Bifenthrin                      | 0.0002              | 0.0003                 | 0.0175                   | 0.0010                 | 0.2389                | NA                    | 422.87           | 8.15  | Non-AChE neurotoxicity | Insect       |
| Boric acid                      | NA                  | NA                     | NA                       | NA                     | 3.7523                | NA                    | 61.83            | -0.22 | NA                     | Insect       |
| Boscalid                        | 2.7000              | NA                     | NA                       | 2.7000                 | 0.3891                | 4.8735                | 343.21           | 4     | NA                     | Fungi        |
| Buprofezin                      | NA                  | NA                     | NA                       | NA                     | 0.9335                | 0.9041                | 305.44           | 4.3   | NA                     | Insect       |
| Butafenacil                     | 3.9000              | NA                     | 4.6000                   | 4.2356                 | 0.0033                | 0.0033                | 474.81           | 3.05  | NA                     | Plant        |
| Butralin                        | 0.3700              | 1.0000                 | NA                       | 0.6083                 | 2.9817                | 4.5424                | 295.33           | 4.93  | Reactivity             | Plant        |

| Chemical             | Juvenile Trout LC50 | Juvenile Bluegill LC50 | Juvenile Sheepshead LC50 | All Juvenile Fish LC50 | Zebrafish Embryo AC50 | Zebrafish Embryo LC50 | Molecular Weight | Log P | General Mode of Action | Target Group |
|----------------------|---------------------|------------------------|--------------------------|------------------------|-----------------------|-----------------------|------------------|-------|------------------------|--------------|
| Captafol             | 0.0966              | 0.2255                 | NA                       | 0.1476                 | 0.6049                | 0.6005                | 349.06           | 3.8   | Narcosis               | Fungi        |
| Captan               | 0.0730              | 0.2091                 | 1.9000                   | 0.3072                 | 0.3585                | 0.5172                | 300.59           | 2.8   | Narcosis               | Fungi        |
| Carbaryl             | 1.2000              | 8.4058                 | 2.3917                   | 2.8895                 | 11.7698               | NA                    | 201.22           | 2.36  | AChE neurotoxicity     | Insect       |
| Carboxin             | 2.1448              | 2.0785                 | NA                       | 2.1114                 | 1.2062                | 1.2064                | 235.30           | 2.67  | Narcosis               | Fungi        |
| Carfentrazone-ethyl  | 1.6000              | 2.0000                 | NA                       | 1.7889                 | 0.2348                | 0.2332                | 412.19           | 3.36  | NA                     | Plant        |
| Chloroneb            | 3.7000              | 6.2217                 | NA                       | 4.7980                 | 14.5887               | NA                    | 207.05           | 3.44  | Narcosis               | Fungi        |
| Chlorothalonil       | 0.0595              | 0.1006                 | 0.0320                   | 0.0576                 | 0.0835                | 0.0851                | 265.91           | 3.05  | Reactivity             | Fungi        |
| Chlorpropham         | 4.1490              | 6.5452                 | NA                       | 5.2111                 | 15.1475               | NA                    | 213.66           | 3.51  | Narcosis               | Plant        |
| Chlorpyrifos-methyl  | 0.0126              | 0.8800                 | NA                       | 0.1053                 | 9.8846                | 14.8897               | 322.53           | 4.31  | AChE neurotoxicity     | Insect       |
| Clodinafop-propargyl | 0.3421              | 0.2400                 | NA                       | 0.2865                 | 0.1115                | 0.1119                | 349.74           | 3.9   | Narcosis               | Plant        |
| Cyazofamid           | NA                  | NA                     | NA                       | NA                     | 1.1412                | 1.0101                | 324.79           | 2.87  | NA                     | Fungi        |
| Cyclanilide          | NA                  | NA                     | 49.0000                  | 49.0000                | 4.4820                | 7.3020                | 274.10           | 1.84  | Narcosis               | Plant        |
| Cyfluthrin           | 0.0007              | 0.0015                 | 0.0041                   | 0.0016                 | 0.1432                | NA                    | 434.29           | 5.95  | Non-AChE neurotoxicity | Insect       |
| Cyhalofop-butyl      | NA                  | NA                     | NA                       | NA                     | 1.0520                | 1.0583                | 357.55           | 4.47  | NA                     | Plant        |
| Cymoxanil            | 61.0000             | 29.0000                | NA                       | 42.0595                | 8.4016                | 15.3668               | 198.18           | 4.24  | Narcosis               | Fungi        |
| Cypermethrin         | 0.0010              | NA                     | 0.0020                   | 0.0014                 | 0.1354                | NA                    | 416.30           | 6.06  | Non-AChE neurotoxicity | Insect       |
| Cyproconazole        | 19.0000             | 21.0000                | 21.0000                  | 20.3110                | 19.7948               | NA                    | 291.78           | 2.9   | Narcosis               | Fungi        |
| Cyprodinil           | 2.4100              | 2.6412                 | 1.2500                   | 1.9964                 | 2.3219                | 3.4651                | 225.29           | 4     | Narcosis               | Fungi        |
| Daminozide           | 149.3000            | 448.0000               | NA                       | 258.6241               | 10.6526               | NA                    | 160.17           | -1.5  | Reactivity             | Plant        |
| Dazomet              | 0.7457              | 0.3000                 | 6.9642                   | 1.1593                 | 0.0457                | NA                    | 162.28           | 1.4   | Reactivity             | Plant        |
| Dichloran            | 0.9466              | 6.3214                 | NA                       | 2.4462                 | 12.3615               | NA                    | 207.01           | 2.8   | Narcosis               | Fungi        |
| Dichlorprop          | 0.5000              | NA                     | NA                       | 0.5000                 | 0.2250                | NA                    | 235.06           | 3.43  | NA                     | Plant        |
| Dichlorvos           | 0.1000              | 0.8690                 | 7.3500                   | 0.8612                 | 11.0545               | NA                    | 220.98           | 1.47  | AChE neurotoxicity     | Insect       |
| Diclofop-methyl      | 0.7464              | 0.2809                 | NA                       | 0.4578                 | 1.1683                | 1.4500                | 341.19           | 4.62  | Narcosis               | Plant        |
| Dicofol              | 0.1240              | 0.5150                 | 0.3700                   | 0.2869                 | 3.8279                | 5.6983                | 370.49           | 5.02  | Non-AChE neurotoxicity | Insect       |

| Chemical           | Juvenile Trout LC50 | Juvenile Bluegill LC50 | Juvenile Sheepshead LC50 | All Juvenile Fish LC50 | Zebrafish Embryo AC50 | Zebrafish Embryo LC50 | Molecular Weight | Log P | General Mode of Action | Target Group |
|--------------------|---------------------|------------------------|--------------------------|------------------------|-----------------------|-----------------------|------------------|-------|------------------------|--------------|
| Difenoconazole     | 0.9266              | 1.2000                 | 0.9497                   | 1.0183                 | 1.4450                | 2.0829                | 406.26           | 4.3   | Narcosis               | Fungi        |
| Dimethenamid       | 2.6000              | 6.4000                 | 7.2000                   | 4.9298                 | 8.4096                | 12.7320               | 275.79           | 2.15  | Narcosis               | Plant        |
| Dimethomorph       | 6.2000              | NA                     | 11.3000                  | 8.3702                 | 11.2201               | NA                    | 387.86           | 2.68  | Narcosis               | Fungi        |
| Diphenylamine      | 2.2000              | NA                     | NA                       | 2.2000                 | 5.7396                | 7.8121                | 169.22           | 3.5   | Narcosis               | Fungi        |
| Disulfoton         | 2.3558              | 0.1082                 | 1.0000                   | 0.6340                 | 19.9638               | NA                    | 274.40           | 4.02  | AChE neurotoxicity     | Insect       |
| Dithiopyr          | 0.4600              | 0.4700                 | NA                       | 0.4650                 | 3.1194                | 6.1858                | 401.42           | 4.75  | Narcosis               | Plant        |
| Emamectin benzoate | 0.1740              | 0.1800                 | 1.4300                   | 0.3551                 | 2.8043                | 2.9844                | 1008.24          | 0     | Non-AChE neurotoxicity | Insect       |
| Endosulfan         | 0.0011              | 0.0019                 | 0.0003                   | 0.0009                 | 0.3960                | 3.6135                | 406.93           | 3.83  | Non-AChE neurotoxicity | Insect       |
| Ethalfuralin       | 0.0709              | 0.0571                 | 0.2400                   | 0.0991                 | 3.3503                | NA                    | 333.26           | 5.11  | Reactivity             | Plant        |
| Etoxazole          | NA                  | NA                     | NA                       | NA                     | 0.6216                | 0.6184                | 359.41           | 7.21  | Narcosis               | Acari        |
| Etridiazole        | 1.3622              | NA                     | 4.0000                   | 2.3343                 | 1.0664                | NA                    | 247.53           | 3.37  | Narcosis               | Fungi        |
| Famoxadone         | 0.0120              | 0.0130                 | 0.0494                   | 0.0198                 | 0.0677                | 0.1198                | 374.39           | 4.65  | NA                     | Fungi        |
| Fenamidone         | 0.7400              | 0.7400                 | 2.5000                   | 1.1104                 | 0.7099                | 0.9217                | 311.40           | 3.45  | Narcosis               | Fungi        |
| Fenamiphos         | 0.0590              | NA                     | NA                       | 0.0590                 | 24.2686               | NA                    | 303.36           | 3.23  | AChE neurotoxicity     | Insect       |
| Fenarimol          | 2.9885              | 2.0980                 | NA                       | 2.5040                 | 4.8445                | 15.2896               | 331.20           | 3.6   | Narcosis               | Fungi        |
| Fenbuconazole      | 1.5000              | 0.6800                 | 1.8000                   | 1.2245                 | 7.9376                | 9.2685                | 336.82           | 3.23  | Narcosis               | Fungi        |
| Fenhexamid         | 1.3400              | 3.4200                 | 11.0000                  | 3.6941                 | 2.5233                | 2.6835                | 302.20           | 3.72  | Narcosis               | Fungi        |
| Fenitrothion       | 1.6331              | 2.2361                 | NA                       | 1.9110                 | 9.2956                | 12.7985               | 277.23           | 3.3   | AChE neurotoxicity     | Insect       |
| Fenoxaprop-ethyl   | 0.5165              | 0.3100                 | NA                       | 0.4002                 | 0.9377                | 1.0709                | 361.78           | 4.58  | Narcosis               | Plant        |
| Fenoxycarb         | 1.0276              | 1.1732                 | 1.1000                   | 1.0987                 | 3.5502                | 4.6347                | 301.34           | 4.3   | Narcosis               | Insect       |
| Fenpropathrin      | 0.0023              | 0.0022                 | 0.0031                   | 0.0025                 | 0.1133                | NA                    | 349.42           | 5.7   | Non-AChE neurotoxicity | Insect       |
| Fenthion           | 0.7265              | 1.7000                 | 1.2000                   | 1.1401                 | 4.2508                | 4.2809                | 278.33           | 4.09  | AChE neurotoxicity     | Insect       |
| Fipronil           | 0.2460              | 0.0830                 | 0.1300                   | 0.1385                 | 6.7763                | 11.6456               | 437.15           | 4     | Non-AChE neurotoxicity | Insect       |

| Chemical            | Juvenile Trout LC50 | Juvenile Bluegill LC50 | Juvenile Sheepshead LC50 | All Juvenile Fish LC50 | Zebrafish Embryo AC50 | Zebrafish Embryo LC50 | Molecular Weight | Log P | General Mode of Action        | Target Group |
|---------------------|---------------------|------------------------|--------------------------|------------------------|-----------------------|-----------------------|------------------|-------|-------------------------------|--------------|
| Fluazifop-butyl     | 1.4100              | 0.5300                 | NA                       | 0.8645                 | 3.3806                | 3.4043                | 383.36           | 4.5   | NA                            | Plant        |
| Fluazinam           | 0.0629              | 0.0527                 | 0.1200                   | 0.0736                 | 0.3933                | 0.4800                | 465.09           | 3.56  | Electron transport inhibition | Fungi        |
| Fludioxonil         | 0.4700              | 0.7300                 | 1.2000                   | 0.7439                 | 0.4618                | 1.2724                | 248.19           | 4.12  | Narcosis                      | Fungi        |
| Flufenacet          | 4.5146              | 2.3289                 | 3.3800                   | 3.2877                 | 11.2868               | 16.7731               | 363.33           | 3.2   | Narcosis                      | Plant        |
| Flufenpyr-ethyl     | 3.7000              | 2.5000                 | NA                       | 3.0414                 | 0.1749                | 0.2312                | 408.73           | 4.15  | NA                            | Plant        |
| Flumetralin         | 0.0240              | 0.0203                 | NA                       | 0.0221                 | 0.0052                | NA                    | 421.73           | 5.45  | Narcosis                      | Plant        |
| Flumiclorac-pentyl  | NA                  | NA                     | NA                       | NA                     | 1.2399                | 1.2970                | 423.86           | 4.99  | Narcosis                      | Plant        |
| Flumioxazin         | 2.3000              | NA                     | NA                       | 2.3000                 | 2.9873                | 3.1465                | 354.33           | 2.55  | Narcosis                      | Plant        |
| Fluoxastrobin       | 0.4350              | 0.9700                 | NA                       | 0.6496                 | 0.0859                | 0.0859                | 458.83           | 2     | Narcosis                      | Fungi        |
| Fluthiacet-methyl   | 0.0430              | 0.1400                 | 0.1600                   | 0.0988                 | 0.0060                | 0.0084                | 403.88           | 3.77  | Narcosis                      | Plant        |
| Flutolanil          | 5.4000              | NA                     | NA                       | 5.4000                 | 3.7754                | 4.9727                | 323.31           | 3.7   | Narcosis                      | Fungi        |
| Folpet              | 0.0150              | 0.0470                 | 0.0656                   | 0.0359                 | 2.6334                | 2.6334                | 296.56           | 2.85  | Narcosis                      | Fungi        |
| Forchlorfenuron     | 9.2000              | 8.8000                 | NA                       | 8.9978                 | 11.4341               | 11.4341               | 247.68           | 3.2   | NA                            | NA           |
| Halosulfuron-methyl | NA                  | NA                     | NA                       | NA                     | 14.8155               | 20.0731               | 434.81           | 0.4   | Narcosis                      | Plant        |
| Hexaconazole        | NA                  | 5.1000                 | NA                       | 5.1000                 | 5.9021                | 8.3706                | 314.21           | 3.9   | NA                            | Fungi        |
| Imazalil            | 1.7205              | 3.9900                 | NA                       | 2.6200                 | 0.7260                | 0.9094                | 297.18           | 3.82  | NA                            | Fungi        |
| Imazamox            | NA                  | NA                     | NA                       | NA                     | 1.0687                | 1.5654                | 305.33           | 0.73  | NA                            | Plant        |
| Indoxacarb          | 0.6500              | 0.9000                 | NA                       | 0.7649                 | 0.1786                | NA                    | 527.83           | 4.6   | Non-AChE neurotoxicity        | Insect       |
| Iprodione           | 4.2000              | 6.3000                 | 7.7000                   | 5.8843                 | 19.2417               | NA                    | 330.17           | 3     | Narcosis                      | Fungi        |
| Isoxaben            | NA                  | NA                     | NA                       | NA                     | 11.3281               | 8.8550                | 332.39           | 3.94  | NA                            | Plant        |
| Lindane             | 0.0180              | 0.0250                 | 0.1000                   | 0.0356                 | 9.8061                | 13.4261               | 290.83           | 4.14  | Non-AChE neurotoxicity        | Insect       |
| Linuron             | 3.0850              | 9.6000                 | 0.8900                   | 2.9760                 | 8.8968                | 19.3172               | 249.09           | 3.2   | Narcosis                      | Plant        |
| Malathion           | 0.0330              | 0.0310                 | 0.0330                   | 0.0323                 | 7.7681                | 8.3911                | 330.36           | 2.36  | AChE neurotoxicity            | Insect       |
| Mesotrione          | NA                  | NA                     | 520                      | 520                    | 15.9900               | NA                    | 339.32           | 1.49  | NA                            | Plant        |
| Methidathion        | 0.0118              | 0.0044                 | 0.0078                   | 0.0074                 | 13.8742               | NA                    | 302.33           | 2.2   | AChE neurotoxicity            | Insect       |

| Chemical                | Juvenile Trout LC50 | Juvenile Bluegill LC50 | Juvenile Sheepshead LC50 | All Juvenile Fish LC50 | Zebrafish Embryo AC50 | Zebrafish Embryo LC50 | Molecular Weight | Log P | General Mode of Action | Target Group |
|-------------------------|---------------------|------------------------|--------------------------|------------------------|-----------------------|-----------------------|------------------|-------|------------------------|--------------|
| Methomyl                | 1.9636              | 1.3574                 | 1.1600                   | 1.4568                 | 6.7100                | NA                    | 162.21           | 0.6   | AChE neurotoxicity     | Insect       |
| Methoxychlor            | 0.0222              | 0.0429                 | NA                       | 0.0309                 | 0.9102                | 3.0694                | 345.65           | 5.08  | Non-AChE neurotoxicity | Insect       |
| Methyl isothiocyanate   | 0.0694              | 0.1420                 | NA                       | 0.0993                 | 0.2167                | 0.6493                | 73.12            | 0.94  | Reactivity             | Acari        |
| Methylene bithiocyanate | 0.1462              | 0.2291                 | 0.6060                   | 0.2728                 | 0.5094                | 0.6675                | 130.19           | 0.62  | Reactivity             | Fungi        |
| Metiram-zinc            | 0.2290              | NA                     | NA                       | 0.2290                 | 0.3971                | NA                    | 275.77           | 0     | NA                     | Fungi        |
| Metolachlor             | 3.9000              | 0.0100                 | 8.7989                   | 0.7001                 | 9.5652                | 13.1013               | 283.79           | 2.9   | Narcosis               | Plant        |
| Mevinphos               | NA                  | NA                     | NA                       | NA                     | 12.5090               | NA                    | 224.15           | 0.13  | AChE neurotoxicity     | Insect       |
| MGK 264                 | 1.4000              | NA                     | NA                       | 1.4000                 | 2.4030                | 2.4454                | 275.39           | 3.7   | NA                     | NA           |
| Milbemectin             | 0.0045              | 0.0280                 | 0.0280                   | 0.0152                 | 0.0716                | 0.9337                | 542.70           | 5.9   | Non-AChE neurotoxicity | Insect       |
| Myclobutanil            | 4.2000              | 2.4000                 | 4.7000                   | 3.6184                 | 11.4979               | 13.3313               | 288.78           | 2.94  | NA                     | Fungi        |
| Naled                   | 0.2208              | 2.2000                 | 1.2000                   | 0.8353                 | 4.3985                | 5.8567                | 380.78           | 1.38  | AChE neurotoxicity     | Insect       |
| Novaluron               | NA                  | NA                     | NA                       | NA                     | 39.2721               | NA                    | 492.70           | 5.27  | NA                     | Insect       |
| Oryzalin                | 3.3537              | 2.8800                 | NA                       | 3.1078                 | 4.0459                | 5.3272                | 346.36           | 3.73  | Reactivity             | Plant        |
| Oxadiazon               | 1.6855              | 2.0535                 | 1.5000                   | 1.7315                 | 1.7682                | 3.0414                | 345.22           | 4.8   | Narcosis               | Plant        |
| Oxyfluorfen             | 0.4100              | 0.2000                 | NA                       | 0.2864                 | 4.3430                | 9.6357                | 361.70           | 4.73  | Narcosis               | Plant        |
| Paclobutrazol           | 27.8000             | 23.6000                | NA                       | 25.6141                | 7.8817                | 14.0374               | 293.79           | 3.2   | NA                     | Plant        |
| Parathion               | 1.0561              | 0.0860                 | NA                       | 0.3013                 | 2.5054                | 16.4417               | 291.26           | 3.83  | AChE neurotoxicity     | Insect       |
| Pendimethalin           | 0.1380              | 0.1990                 | 0.7100                   | 0.2692                 | 11.9752               | NA                    | 281.31           | 5.18  | Reactivity             | Plant        |
| Permethrin              | 0.0042              | 0.0050                 | 0.0262                   | 0.0082                 | 1.1749                | 14.8181               | 391.29           | 6.5   | Non-AChE neurotoxicity | Insect       |
| Phosalone               | 0.6300              | 0.0500                 | NA                       | 0.1775                 | 3.4442                | 5.6571                | 367.81           | 4.38  | AChE neurotoxicity     | Insect       |
| Piperonyl butoxide      | 3.2032              | 4.7491                 | 3.9400                   | 3.9135                 | 3.8388                | 5.2054                | 338.44           | 4.75  | Narcosis               | NA           |
| Pirimiphos-methyl       | 0.4040              | NA                     | NA                       | 0.4040                 | 3.4476                | 4.6962                | 305.33           | 4.2   | AChE                   | Insect       |

| Chemical                | Juvenile Trout LC50 | Juvenile Bluegill LC50 | Juvenile Sheepshead LC50 | All Juvenile Fish LC50 | Zebrafish Embryo AC50 | Zebrafish Embryo LC50 | Molecular Weight | Log P | General Mode of Action        | Target Group |
|-------------------------|---------------------|------------------------|--------------------------|------------------------|-----------------------|-----------------------|------------------|-------|-------------------------------|--------------|
|                         |                     |                        |                          |                        |                       |                       |                  |       | neurotoxicity                 |              |
| Prallethrin             | 0.0120              | 0.0220                 | 0.0260                   | 0.0190                 | 0.4712                | 1.5260                | 300.39           | 4.49  | Non-AChE neurotoxicity        | Insect       |
| Primisulfuron-methyl    | 210                 | NA                     | NA                       | 210                    | 1.5243                | 2.4011                | 468.34           | 2.41  | Narcosis                      | Plant        |
| Profenofos              | 0.0229              | 0.0279                 | NA                       | 0.0253                 | 3.2477                | 5.7467                | 373.63           | 4.68  | AChE neurotoxicity            | Insect       |
| Propanil                | 2.3000              | NA                     | 4.6000                   | 3.2527                 | 7.1317                | 10.0676               | 218.08           | 3.07  | Narcosis                      | Plant        |
| Propargite              | 0.1180              | 0.1670                 | NA                       | 0.1404                 | 0.0448                | 0.0656                | 350.47           | 5     | NA                            | Insect       |
| Propiconazole           | 2.1024              | 2.6739                 | NA                       | 2.3710                 | 9.1168                | 15.7986               | 342.22           | 3.72  | Narcosis                      | Fungi        |
| Propoxycarbazone-sodium | NA                  | NA                     | NA                       | NA                     | 6.5128                | 23.7300               | 420.37           | 1.32  | NA                            | Plant        |
| Prosulfuron             | NA                  | NA                     | NA                       | NA                     | 8.8443                | 29.7885               | 419.38           | 3.56  | NA                            | Plant        |
| Pymetrozine             | NA                  | NA                     | NA                       | NA                     | 3.7887                | NA                    | 217.23           | 0.89  | Narcosis                      | Insect       |
| Pyraclostrobin          | 2.9816              | 0.0114                 | 0.0769                   | 0.1377                 | 0.0535                | 0.0726                | 387.82           | 5.45  | Narcosis                      | Fungi        |
| Pyraflufen-ethyl        | NA                  | NA                     | NA                       | NA                     | 0.0774                | 0.0774                | 413.18           | 4.87  | NA                            | Plant        |
| Pyridaben               | 0.0013              | 0.0029                 | 0.0172                   | 0.0040                 | 0.0041                | 0.0044                | 364.93           | 6.37  | Electron transport inhibition | Insect       |
| Pyriproxyfen            | NA                  | NA                     | NA                       | NA                     | 8.3977                | 8.5613                | 321.37           | 5.55  | Narcosis                      | Insect       |
| Quinoxyfen              | 0.2700              | NA                     | NA                       | 0.2700                 | 1.0451                | NA                    | 308.13           | 4.66  | NA                            | Fungi        |
| Quintozene              | 0.4195              | 0.1449                 | 2.7210                   | 0.5489                 | 5.5534                | 13.6341               | 295.33           | 4.64  | Narcosis                      | Fungi        |
| Quizalofop-ethyl        | 2.8990              | 0.4600                 | NA                       | 1.1548                 | 0.4564                | 0.6414                | 372.80           | 4.28  | Narcosis                      | Plant        |
| Resmethrin              | 0.0003              | NA                     | 0.0110                   | 0.0018                 | 0.9480                | NA                    | 338.44           | 6.14  | Non-AChE neurotoxicity        | Insect       |
| S-Bioallethrin          | NA                  | 0.0236                 | NA                       | 0.0236                 | 0.3188                | 0.5150                | 302.41           | 4.78  | Non-AChE neurotoxicity        | Insect       |
| Spirodiclofen           | NA                  | NA                     | NA                       | NA                     | 0.7075                | 0.7077                | 411.32           | 6.21  | NA                            | Insect       |
| Sulfentrazone           | NA                  | 93.8000                | NA                       | 93.8000                | 13.1211               | 17.8746               | 387.19           | 2.65  | Narcosis                      | Plant        |
| TCMTB                   | 0.0201              | 0.0320                 | NA                       | 0.0254                 | 0.1030                | 0.1348                | 238.35           | 3.3   | Reactivity                    | Fungi        |
| Tebufenpyrad            | 0.0178              | 0.0930                 | NA                       | 0.0407                 | 0.1068                | 0.1068                | 333.86           | 4.61  | Electron transport            | Insect       |

| Chemical           | Juvenile Trout LC50 | Juvenile Bluegill LC50 | Juvenile Sheepshead LC50 | All Juvenile Fish LC50 | Zebrafish Embryo AC50 | Zebrafish Embryo LC50 | Molecular Weight | Log P | General Mode of Action | Target Group |
|--------------------|---------------------|------------------------|--------------------------|------------------------|-----------------------|-----------------------|------------------|-------|------------------------|--------------|
|                    |                     |                        |                          |                        |                       |                       |                  |       | inhibition             |              |
| Tebupirimfos       | NA                  | NA                     | NA                       | NA                     | 3.0591                | 4.2980                | 318.37           | 4.19  | AChE neurotoxicity     | Insect       |
| Tefluthrin         | 0.0001              | 0.0001                 | 0.0001                   | 0.0001                 | 0.0019                | NA                    | 418.73           | 6.5   | Non-AChE neurotoxicity | Insect       |
| Tetramethrin       | 0.0088              | 0.0174                 | NA                       | 0.0124                 | 3.4242                | 5.0972                | 331.41           | 4.73  | Non-AChE neurotoxicity | Insect       |
| Thiabendazole      | 1.5223              | 18.0206                | NA                       | 5.2377                 | 6.0880                | 9.2906                | 201.25           | 2.47  | Narcosis               | Fungi        |
| Thiamethoxam       | NA                  | NA                     | NA                       | NA                     | 21.8005               | NA                    | 291.71           | 0.8   | Non-AChE neurotoxicity | Insect       |
| Thiazopyr          | 3.4000              | 3.5000                 | 2.9000                   | 3.2557                 | 12.9570               | 18.2986               | 396.38           | 3.89  | Narcosis               | Plant        |
| Thiobencarb        | 1.1500              | 2.4800                 | 0.9495                   | 1.3938                 | 3.4007                | 5.7098                | 257.78           | 3.4   | Narcosis               | Plant        |
| Thiodicarb         | 3.4500              | 1.3282                 | 0.5300                   | 1.3442                 | 10.3616               | 16.3640               | 354.47           | 1.7   | AChE neurotoxicity     | Insect       |
| Thiophanate-methyl | 9.5551              | 58.0000                | 49.5000                  | 30.1594                | 0.4195                | 1.0135                | 342.39           | 1.4   | NA                     | Fungi        |
| Triadimefon        | 7.5763              | 10.4881                | NA                       | 8.9141                 | 7.2780                | NA                    | 293.75           | 2.77  | Narcosis               | Fungi        |
| Triadimenol        | 18.1384             | 15.0000                | NA                       | 16.4947                | 8.8470                | 8.1276                | 295.76           | 3.08  | Narcosis               | Fungi        |
| Tri-allate         | 1.2000              | 1.3149                 | NA                       | 1.2561                 | 8.2745                | 14.0648               | 304.66           | 4.6   | Narcosis               | Plant        |
| Tribufos           | 1.0592              | 0.6250                 | 0.5809                   | 0.7272                 | 0.0453                | 0.0589                | 314.51           | 5.7   | Narcosis               | Plant        |
| Triclosan          | 0.2880              | NA                     | NA                       | 0.2880                 | 0.7699                | 0.8570                | 289.54           | 4.76  | Narcosis               | Bacteria     |
| Trifloxystrobin    | 0.0140              | 0.0540                 | 0.0780                   | 0.0389                 | 0.1088                | 0.1268                | 408.37           | 6.62  | Narcosis               | Fungi        |
| Triflumizole       | 0.5800              | 0.7589                 | 1.4000                   | 0.8510                 | 0.5589                | 0.5912                | 345.75           | 1.4   | Narcosis               | Fungi        |
| Trifluralin        | 0.0220              | 0.0084                 | 0.1600                   | 0.0309                 | 0.2110                | NA                    | 335.28           | 5.34  | Reactivity             | Plant        |
| Triticonazole      | NA                  | NA                     | NA                       | NA                     | 4.1460                | NA                    | 317.81           | 3.29  | NA                     | Fungi        |
| Vinclozolin        | 2.8400              | 47.5000                | NA                       | 11.6146                | 10.7412               | NA                    | 286.11           | 3.1   | Narcosis               | Fungi        |
| Zoxamide           | 0.1560              | NA                     | NA                       | 0.1560                 | 1.7259                | 1.7259                | 336.64           | 4.35  | Narcosis               | Fungi        |
